# Supplementary material for: The m6A writer METTL5 promotes LUSC progression by enhancing CDC45 translation.
Source: Research Square preprint supplement (doi:10.21203/rs.3.rs-4891277/v1), 2024-09-20
Supplement: Supplementary file 1 [file d5947109dd8a0110c1484515.xlsx]

## Sheet: Table S1
Table-S1: 28 m6A regulators
Gene	Type
METTL3	writers
METTL4	writers
METTL5	writers
METTL14	writers
METTL16	writers
WTAP	writers
VIRMA	writers
ZC3H13	writers
RBM15	writers
RBM15B	writers
EIF3A	readers
YTHDC1	readers
YTHDC2	readers
YTHDF1	readers
YTHDF2	readers
YTHDF3	readers
HNRNPC	readers
HNRNPG	readers
FMRP	readers
LRPPRC	readers
HNRNPA2B1	readers
IGF2BP1	readers
IGF2BP2	readers
IGF2BP3	readers
RBM33	readers
FTO	erasers
ALKBH3	erasers
ALKBH5	erasers

## Sheet: Table S2
Table-S2: The number of nodes of Protein–protein interaction network
Gene	Count
NUF2	18
CENPA	17
CDC45	14
HJURP	14
NCAPG	14
CDCA3	12
TTK	12
CYP2A6	11
PBK	11
CACNA1C	10
AURKB	10
CYP1A2	10
CYP2C9	10
CYP3A7	9
DNAI1	8
EXO1	8
SHH	8
SPC25	8
CDKN3	7
CYP4A11	7
DEPDC1	7
DNAI2	7
MCM10	7
SCN4B	7
C1orf158	6
CFAP161	6
CFAP52	6
CFAP77	6
CYP4A22	6
OIP5	6
TEKT1	6
TEKT3	6
TEKT4	6
CCL7	5
CCR6	5
CDC25C	5
FGF10	5
FGF8	5
IHH	5
PTCH1	5
RYR2	5
SGO1	5
SKA1	5
SLC6A4	5
SPC24	5
TEK	5
TNNT3	5
UGT1A6	5
UGT1A7	5
VIP	5
CKAP2L	4
CSAG1	4
CXCR5	4
CYP7A1	4
DNAH7	4
DNAH8	4
ERBB4	4
ESCO2	4
FLG	4
GLI1	4
GRIA1	4
GRIN2A	4
HHIP	4
HTR2A	4
KL	4
LRP2	4
MYH8	4
ROBO2	4
SKA3	4
TNNI3	4
TRDN	4
TROAP	4
UGT2B15	4
WDR63	4
ADCY8	3
ADCYAP1	3
AHSG	3
CASQ2	3
CAV3	3
CCL16	3
CYP4F3	3
DNAAF1	3
DNAH12	3
DUOX1	3
DUOX2	3
EPB42	3
FGF19	3
FLG2	3
GINS2	3
GLP1R	3
GP6	3
GRM3	3
GSTM5	3
HTR1B	3
HTR2C	3
ITGA8	3
ITGA9	3
KCNA2	3
KCNE1	3
MAGEA12	3
MAGEA3	3
MAGEA6	3
MYH1	3
MYH2	3
RPL3L	3
RYR3	3
SCN1A	3
SCN2B	3
TNNT1	3
VEGFD	3
ADCYAP1R1	2
ADGRV1	2
AFP	2
ALDOB	2
AR	2
ASPA	2
ATP1A2	2
C6	2
C8A	2
C8B	2
CACNA2D2	2
CACNB4	2
CAPN3	2
CCL26	2
CDH23	2
CHRNB3	2
CNGA4	2
CRHR2	2
CX3CR1	2
CXCR1	2
DCC	2
DNAH6	2
DNAH9	2
DUOXA1	2
DUOXA2	2
ELANE	2
ENAM	2
FGF5	2
FLT3	2
GADL1	2
GAL	2
GIP	2
GJA3	2
GRIA3	2
HBQ1	2
HCN4	2
HTR1D	2
IFNL1	2
IGFBP1	2
IL20RB	2
KCND3	2
KIF18B	2
KLK5	2
KRT1	2
LIPN	2
MYH11	2
MYOCD	2
OCA2	2
ORC6	2
PADI3	2
PCDH15	2
PGR	2
PIMREG	2
PPP2R2C	2
RGS6	2
RGS7BP	2
RGS9BP	2
RPL10L	2
RPS10-NUDT3	2
RUNX1T1	2
SCN7A	2
SGCG	2
SLC18A2	2
SLC24A5	2
SLIT2	2
SLIT3	2
STRA8	2
SYCP3	2
TERT	2
TICRR	2
TNN	2
TNR	2
TNXB	2
TRPM1	2
VIPR1	2
XCR1	2
ZBTB16	2
ZP3	2
A4GNT	1
ACRV1	1
ADH1A	1
ADH1B	1
AGBL1	1
ALOXE3	1
ANGPT4	1
ANO2	1
APOBEC3B	1
APOBEC4	1
AQP10	1
AQP2	1
AQP6	1
ARC	1
ATP1B2	1
CA1	1
CDO1	1
CEACAM8	1
CFAP221	1
CFAP43	1
CFAP54	1
CFAP61	1
CFAP74	1
CHRNA2	1
CMA1	1
CNGB3	1
COL6A5	1
COL6A6	1
CRHBP	1
CRYBA1	1
CTSG	1
CUBN	1
CYP2A7	1
DCX	1
DEPDC1B	1
DPP6	1
DRC7	1
DSCC1	1
EDA2R	1
EME1	1
ENO4	1
F11	1
F12	1
FAM72B	1
FAM72C	1
FBXO43	1
FPGT-TNNI3K	1
FTCD	1
GALR3	1
GBX2	1
GNRH2	1
GNRHR	1
GREB1	1
GRM6	1
HBE1	1
HCN1	1
HEMGN	1
HORMAD2	1
HPR	1
HRG	1
IFNB1	1
IGF2BP1	1
IGF2BP3	1
IL19	1
IL23R	1
JPH4	1
KCNA4	1
KCNA5	1
KCNB1	1
KCNE1B	1
KCNJ5	1
KCNK3	1
KCNK9	1
KLK2	1
KLK8	1
LCN10	1
LCN6	1
LDHC	1
LHX2	1
LOXHD1	1
LPA	1
LRRTM2	1
MAATS1	1
MAGEA1	1
MASP1	1
MASP2	1
MEIOB	1
MLANA	1
MMP20	1
MS4A2	1
MS4A4E	1
MS4A6E	1
MUC6	1
NEIL3	1
NFASC	1
NR0B1	1
NRG3	1
NRXN3	1
ODAM	1
PAK3	1
PCSK5	1
PDE1C	1
PHACTR1	1
PIF1	1
PIH1D3	1
PITX3	1
PLA2G1B	1
PLAC1	1
PLXNA4	1
PNPLA1	1
POLQ	1
PRAME	1
PTH1R	1
PTPRD	1
RGS22	1
RSPH10B	1
RSPH10B2	1
RSPO1	1
RXFP1	1
RXFP2	1
SELP	1
SEMA6D	1
SLC10A1	1
SLC12A1	1
SLC17A8	1
SLC24A4	1
SLITRK2	1
SOHLH1	1
SOST	1
SOX5	1
SOX6	1
TAL1	1
TCTE1	1
TEX48	1
TLX1	1
TMEFF2	1
TMEM212	1
TRIM71	1
TTC29	1
UCN2	1
WFDC12	1
WFDC5	1
WIF1	1
WNT9B	1
XAGE1A	1
XAGE1B	1
YBX2	1
ZIC2	1
ZP1	1

## Sheet: Table S3
Table-S3: Cox analysis of the DEGs
gene	KM	HR	HR.95L	HR.95H	pvalue
TESMIN	0.000129017	1.42106	1.17826	1.7139	0.000237002
PBK	0.00520837	1.25493	1.1053	1.42482	0.000455789
C16orf74	0.00919277	1.30043	1.13147	1.49462	0.000216102
FAM72B	0.000491118	1.69541	1.17911	2.43777	0.00438307
DEPDC1	0.00662227	1.27531	1.08549	1.49834	0.00310122
CDC45	0.00884431	1.22088	1.06185	1.40373	0.00506624
LY6K	0.00368339	1.16282	1.05268	1.28447	0.00296579
LYPD3	0.00352378	1.23744	1.13438	1.34985	1.57097e-06
KCNV1	0.00241297	2.97973	1.93689	4.58404	6.76566e-07
CTSV	0.00180078	1.26906	1.1165	1.44247	0.00026604
SPC24	0.00903992	1.23397	1.05672	1.44095	0.00787633
DEPDC1B	0.000296046	1.32314	1.12474	1.55653	0.000729569
ZIC5	0.00628674	2.03182	1.3911	2.96764	0.000244698
NEIL3	0.000517668	1.25486	1.08943	1.4454	0.00164667
CDC25C	0.000285485	1.51388	1.23584	1.85449	6.19889e-05
HJURP	0.00142087	1.31725	1.14969	1.50924	7.20661e-05
EXO1	0.0060087	1.38574	1.18541	1.61992	4.22157e-05
CREG2	0.00283361	1.58636	1.29039	1.95023	1.18825e-05
SH2D5	0.00445092	1.86029	1.34104	2.58061	0.000201422
CDKN3	0.000974859	1.30808	1.1421	1.4982	0.00010488
PIMREG	0.00407128	1.26692	1.08797	1.47529	0.00232455
SKA3	0.00168433	1.38274	1.16119	1.64656	0.000275524
SPC25	0.0032982	1.38835	1.16823	1.64994	0.000194995
IGFBP1	0.00396209	1.29229	1.15668	1.44379	5.80279e-06
RAET1L	0.00490931	1.45597	1.11126	1.9076	0.00642452
OIP5	0.00104519	1.38792	1.17341	1.64164	0.000129799
CDCA3	0.000698465	1.3244	1.10999	1.58023	0.00182036
AURKB	0.00486797	1.18165	1.04723	1.33334	0.00675173
FAM131C	0.00975179	1.65263	1.15211	2.3706	0.00634926
PITX3	4.08573e-07	10.707	5.81275	19.7222	2.79897e-14
MTFR2	0.00692239	1.30443	1.06881	1.59198	0.00893023

## Sheet: Table S4
Table-S4: siRNA or shRNA sequences for indicated genes
shRNA	Species	Sequence
shCtrl	human	UUCUCCGAACGUGUCACG
shMETTL5#1	human	AGCATCGGAACTGCAATGTTAGG
shMETTL5#1	human	AAGGAACTAGAGAGTCGCCTG

## Sheet: Table S5
Table-S5: Sequences of primers used for qRT-PCR
METTL5	Forward (5’-3’)	CTTTGGAAATGGCAAGAACAGCAG
	Reverse (5’-3’)	ATTAGGTCCACTTCAATGTCCACTG
CDC45	Forward (5’-3’)	CTGCGCCTTCAGCGTCTG
	Reverse (5’-3’)	TGTAGTCTTCAACGACAGG
